# Supplementary material for: The Challenge of Urban Heat Exposure under Climate Change: An Analysis of Cities in the Sustainable Healthy Urban Environments (SHUE) Database
Source: PubMed Central journal article supplement (PMC6614032; doi:10.3390/cli5040093), 2017-12-13
Supplement: EMS83178-supplement-Table_S1_and_S2.pdf [file EMS83178-supplement-Table_S1_and_S2.pdf]

## **Supplementary materials**

### **The Challenge of Urban Heat Exposure under Climate Change: An Analysis of Cities in the Sustainable Healthy Urban Environments (SHUE) Database**

This appendix accompanies the paper “The Challenge of Urban Heat Exposure under Climate Change: An Analysis of Cities in the Sustainable Healthy Urban Environments (SHUE) Database”. It provides two additional tables not presented in the main paper showing the inter-city range of the estimated temperature increases.

**Table S1.** Minimum of GCM estimates of changes in  $T_{\text{mean}}$  by 2050 and 2100 (relative to 2017).

| WHO Region            | Ecoregion Domain | Cities | 2050      |                    |                    |           |                    |                    | 2100      |                    |                    |           |                    |                    |
|-----------------------|------------------|--------|-----------|--------------------|--------------------|-----------|--------------------|--------------------|-----------|--------------------|--------------------|-----------|--------------------|--------------------|
|                       |                  |        | RCP2.6    |                    |                    | RCP8.5    |                    |                    | RCP2.6    |                    |                    | RCP8.5    |                    |                    |
|                       |                  |        | Mean (°C) | Coldest month (°C) | Hottest month (°C) | Mean (°C) | Coldest month (°C) | Hottest month (°C) | Mean (°C) | Coldest month (°C) | Hottest month (°C) | Mean (°C) | Coldest month (°C) | Hottest month (°C) |
| Africa                | Polar            | 0      | -         | -                  | -                  | -         | -                  | -                  | -         | -                  | -                  | -         | -                  | -                  |
|                       | Humid temperate  | 2      | 0.92      | 0.68               | 1.12               | 1.27      | 1.03               | 1.56               | 1.07      | 0.80               | 1.28               | 4.08      | 3.19               | 5.16               |
|                       | Dry              | 3      | 0.69      | 0.62               | 0.70               | 1.01      | 1.02               | 0.96               | 0.81      | 0.73               | 0.86               | 3.40      | 3.28               | 3.33               |
|                       | Humid tropical   | 15     | 0.67      | 0.65               | 0.63               | 0.99      | 0.90               | 0.94               | 0.81      | 0.74               | 0.84               | 3.21      | 3.05               | 2.93               |
| Americas              | Polar            | 1      | 1.26      | 1.49               | 1.28               | 1.59      | 1.79               | 1.63               | 1.50      | 1.96               | 1.37               | 5.03      | 5.78               | 5.39               |
|                       | Humid temperate  | 18     | 0.41      | 0.34               | 0.42               | 0.69      | 0.69               | 0.58               | 0.54      | 0.60               | 0.58               | 2.22      | 2.40               | 2.13               |
|                       | Dry              | 10     | 0.69      | 0.68               | 0.68               | 0.96      | 0.92               | 1.04               | 0.81      | 0.73               | 0.81               | 3.22      | 3.27               | 3.30               |
|                       | Humid tropical   | 27     | 0.64      | 0.51               | 0.60               | 0.88      | 0.75               | 0.89               | 0.77      | 0.55               | 0.77               | 2.85      | 2.53               | 2.93               |
| Eastern Mediterranean | Polar            | 0      | -         | -                  | -                  | -         | -                  | -                  | -         | -                  | -                  | -         | -                  | -                  |
|                       | Humid temperate  | 3      | 0.93      | 0.73               | 0.92               | 1.31      | 1.11               | 1.25               | 1.07      | 0.81               | 1.18               | 4.25      | 3.42               | 4.27               |
|                       | Dry              | 13     | 0.77      | 0.72               | 0.65               | 1.12      | 1.09               | 1.00               | 0.96      | 0.91               | 0.80               | 3.63      | 3.40               | 3.25               |
|                       | Humid tropical   | 3      | 0.88      | 1.08               | 0.84               | 1.47      | 1.40               | 1.58               | 1.19      | 1.23               | 1.24               | 4.99      | 4.94               | 5.08               |
| Europe                | Polar            | 4      | 0.79      | 0.86               | 0.52               | 1.21      | 1.43               | 0.82               | 1.04      | 1.35               | 0.58               | 4.35      | 5.79               | 2.85               |
|                       | Humid temperate  | 45     | 0.78      | 0.59               | 0.97               | 1.02      | 0.86               | 1.33               | 0.87      | 0.69               | 1.14               | 3.21      | 2.72               | 4.19               |
|                       | Dry              | 6      | 1.03      | 0.79               | 1.17               | 1.42      | 1.09               | 1.65               | 1.22      | 1.05               | 1.21               | 4.53      | 3.35               | 5.62               |
|                       | Humid tropical   | 0      | -         | -                  | -                  | -         | -                  | -                  | -         | -                  | -                  | -         | -                  | -                  |
| South-East Asia       | Polar            | 0      | -         | -                  | -                  | -         | -                  | -                  | -         | -                  | -                  | -         | -                  | -                  |
|                       | Humid temperate  | 2      | 1.12      | 1.27               | 1.11               | 1.44      | 1.47               | 1.47               | 1.27      | 1.36               | 1.37               | 4.60      | 5.12               | 4.59               |
|                       | Dry              | 1      | 0.77      | 1.09               | 0.71               | 1.15      | 1.36               | 1.13               | 0.95      | 1.20               | 0.96               | 3.83      | 4.70               | 3.47               |
|                       | Humid tropical   | 36     | 0.60      | 0.51               | 0.61               | 0.87      | 0.81               | 0.88               | 0.69      | 0.62               | 0.67               | 2.89      | 2.80               | 2.90               |
| Western Pacific       | Polar            | 1      | 1.23      | 1.43               | 0.95               | 1.65      | 1.62               | 1.36               | 1.36      | 1.44               | 1.15               | 5.39      | 6.33               | 4.82               |
|                       | Humid temperate  | 43     | 0.58      | 0.53               | 0.64               | 0.81      | 0.76               | 0.88               | 0.56      | 0.56               | 0.57               | 2.88      | 2.70               | 3.24               |
|                       | Dry              | 2      | 0.67      | 0.66               | 0.74               | 0.95      | 0.79               | 1.09               | 0.78      | 0.72               | 0.87               | 3.10      | 2.77               | 3.33               |
|                       | Humid tropical   | 10     | 0.60      | 0.61               | 0.64               | 0.86      | 0.93               | 0.92               | 0.75      | 0.80               | 0.78               | 2.96      | 2.94               | 3.21               |

**Table S2.** Maximum of GCM estimates of changes in  $T_{\text{mean}}$  by 2050 and 2100 (relative to 2017).

| WHO Region            | Ecoregion Domain | Cities | 2050      |                    |                    |           |                    |                    | 2100      |                    |                    |           |                    |                    |
|-----------------------|------------------|--------|-----------|--------------------|--------------------|-----------|--------------------|--------------------|-----------|--------------------|--------------------|-----------|--------------------|--------------------|
|                       |                  |        | RCP2.6    |                    |                    | RCP8.5    |                    |                    | RCP2.6    |                    |                    | RCP8.5    |                    |                    |
|                       |                  |        | Mean (°C) | Coldest month (°C) | Hottest month (°C) | Mean (°C) | Coldest month (°C) | Hottest month (°C) | Mean (°C) | Coldest month (°C) | Hottest month (°C) | Mean (°C) | Coldest month (°C) | Hottest month (°C) |
| Africa                | Polar            | 0      | -         | -                  | -                  | -         | -                  | -                  | -         | -                  | -                  | -         | -                  | -                  |
|                       | Humid temperate  | 2      | 0.99      | 0.72               | 1.36               | 1.37      | 1.14               | 1.88               | 1.12      | 0.84               | 1.43               | 4.37      | 3.34               | 5.74               |
|                       | Dry              | 3      | 0.97      | 1.05               | 0.92               | 1.39      | 1.45               | 1.39               | 1.17      | 1.15               | 1.33               | 4.66      | 4.44               | 4.55               |
|                       | Humid tropical   | 15     | 0.94      | 1.01               | 1.25               | 1.36      | 1.42               | 1.52               | 1.11      | 1.20               | 1.43               | 4.53      | 4.48               | 5.44               |
| Americas              | Polar            | 1      | 1.26      | 1.49               | 1.28               | 1.59      | 1.79               | 1.63               | 1.50      | 1.96               | 1.37               | 5.03      | 5.78               | 5.39               |
|                       | Humid temperate  | 18     | 1.38      | 1.54               | 1.36               | 1.86      | 2.17               | 1.90               | 1.65      | 2.35               | 1.47               | 5.60      | 6.72               | 5.89               |
|                       | Dry              | 10     | 1.16      | 1.18               | 1.32               | 1.60      | 1.83               | 1.80               | 1.56      | 2.22               | 1.40               | 5.07      | 5.24               | 5.85               |
|                       | Humid tropical   | 27     | 0.93      | 0.97               | 1.04               | 1.29      | 1.26               | 1.49               | 1.15      | 1.15               | 1.39               | 4.41      | 4.33               | 5.10               |
| Eastern Mediterranean | Polar            | 0      | -         | -                  | -                  | -         | -                  | -                  | -         | -                  | -                  | -         | -                  | -                  |
|                       | Humid temperate  | 3      | 1.00      | 0.76               | 1.33               | 1.37      | 1.26               | 1.76               | 1.15      | 0.98               | 1.41               | 4.36      | 3.71               | 5.24               |
|                       | Dry              | 13     | 1.18      | 1.42               | 1.50               | 1.65      | 1.76               | 1.89               | 1.42      | 1.67               | 1.55               | 5.52      | 5.89               | 5.95               |
|                       | Humid tropical   | 3      | 1.03      | 1.22               | 1.08               | 1.52      | 1.56               | 1.61               | 1.31      | 1.38               | 1.33               | 5.17      | 5.28               | 5.23               |
| Europe                | Polar            | 4      | 1.55      | 1.88               | 1.35               | 1.88      | 1.89               | 1.72               | 1.67      | 2.26               | 1.37               | 6.14      | 7.26               | 5.53               |
|                       | Humid temperate  | 45     | 1.42      | 1.64               | 1.59               | 1.85      | 1.98               | 2.17               | 1.65      | 2.23               | 1.78               | 5.60      | 7.14               | 7.00               |
|                       | Dry              | 6      | 1.23      | 1.34               | 1.61               | 1.58      | 1.50               | 2.09               | 1.34      | 1.59               | 1.74               | 5.26      | 5.31               | 6.45               |
|                       | Humid tropical   | 0      | -         | -                  | -                  | -         | -                  | -                  | -         | -                  | -                  | -         | -                  | -                  |
| South-East Asia       | Polar            | 0      | -         | -                  | -                  | -         | -                  | -                  | -         | -                  | -                  | -         | -                  | -                  |
|                       | Humid temperate  | 2      | 1.13      | 1.29               | 1.15               | 1.45      | 1.53               | 1.49               | 1.29      | 1.44               | 1.39               | 4.68      | 5.17               | 4.67               |
|                       | Dry              | 1      | 0.77      | 1.09               | 0.71               | 1.15      | 1.36               | 1.13               | 0.95      | 1.20               | 0.96               | 3.83      | 4.70               | 3.47               |
|                       | Humid tropical   | 36     | 0.94      | 1.21               | 1.00               | 1.46      | 1.53               | 1.57               | 1.18      | 1.38               | 1.27               | 4.95      | 4.99               | 5.00               |
| Western Pacific       | Polar            | 1      | 1.23      | 1.43               | 0.95               | 1.65      | 1.62               | 1.36               | 1.36      | 1.44               | 1.15               | 5.39      | 6.33               | 4.82               |
|                       | Humid temperate  | 43     | 1.24      | 1.56               | 1.21               | 1.59      | 1.66               | 1.66               | 1.39      | 1.53               | 1.51               | 5.24      | 6.08               | 4.95               |
|                       | Dry              | 2      | 1.20      | 1.22               | 1.10               | 1.55      | 1.53               | 1.42               | 1.30      | 1.19               | 1.26               | 4.97      | 5.10               | 4.81               |
|                       | Humid tropical   | 10     | 0.88      | 0.81               | 0.80               | 1.20      | 1.24               | 1.19               | 1.16      | 1.20               | 1.00               | 3.86      | 3.80               | 3.74               |
